# Supplementary material
Source: ML conference proceedings conference paper supplement (https://proceedings.mlr.press/v32/tandon14.html)
Supplement: Supplementary file 1 [file tandon14-supp.pdf]

---

# Learning Graphs with a Few Hubs - Supplementary

---

**Rashish Tandon, Pradeep Ravikumar**

{RASHISH, PRADEEPR}@CS.UTEXAS.EDU

Department of Computer Science  
The University of Texas at Austin, USA

## 1. Proof of Corollary 1

*Proof.* For any  $t \in \mathcal{N}_{\text{sub}}^*(r)$ , we have

$$\widehat{\mathcal{N}}_\lambda(r; D) = \mathcal{N}_{\text{sub}}^*(r) \Rightarrow t \in \widehat{\mathcal{N}}_\lambda(r; D). \quad (1)$$

For any  $t \notin \mathcal{N}_{\text{sub}}^*(r)$ , we have

$$t \in \widehat{\mathcal{N}}_\lambda(r; D) \Rightarrow \widehat{\mathcal{N}}_\lambda(r; D) \neq \mathcal{N}_{\text{sub}}^*(r). \quad (2)$$

Thus,

$$\begin{aligned} \mathbb{P}(t \in \widehat{\mathcal{N}}_\lambda(r; D)) &\geq \mathbb{P}(\widehat{\mathcal{N}}_\lambda(r; D) = \mathcal{N}_{\text{sub}}^*(r)) && \text{if } t \in \mathcal{N}_{\text{sub}}^*(r) \text{ and,} \\ \mathbb{P}(t \in \widehat{\mathcal{N}}_\lambda(r; D)) &\leq \mathbb{P}(\widehat{\mathcal{N}}_\lambda(r; D) \neq \mathcal{N}_{\text{sub}}^*(r)) && \text{if } t \notin \mathcal{N}_{\text{sub}}^*(r). \end{aligned} \quad (3)$$

Now, using the result of Theorem 1 proves the corollary. □

## 2. Proof of Proposition 1

*Proof.* The proof of this proposition is similar to Theorem 4.1 in (Liu et al., 2010). First note that,

$$\mathbb{E}[\widetilde{p}_{r,b,\lambda}(t; D)] = \frac{1}{\binom{n}{b}} \sum_{D_b \in S_b(D)} \mathbb{E}[F_{\lambda,r}^t(D_b)] = \frac{1}{\binom{n}{b}} \sum_{D_b \in S_b(D)} \mathbb{P}(t \in \widehat{\mathcal{N}}_{b,\lambda}(r; D_b)), \quad (4)$$

where the expectation and probability are taken over the samples  $D$  being drawn i.i.d. For any fixed set of  $b$  indices, drawing  $n$  samples i.i.d. and then choosing the  $b$  samples corresponding to the fixed indices is equivalent to drawing  $b$  samples i.i.d. Thus, for any  $D_b \in S_b(D)$ , we have  $\mathbb{P}(t \in \widehat{\mathcal{N}}_{b,\lambda}(r; D_b)) = p_{r,b,\lambda}(t)$ , which implies

$$\mathbb{E}[\widetilde{p}_{r,b,\lambda}(t; D)] = p_{r,b,\lambda}(t). \quad (5)$$

Using Hoeffding's inequality for a U-statistics (Serfling, 1981), we can concentrate  $\widetilde{p}_{r,b,\lambda}(t; D)$  around its expectation as

$$\mathbb{P}\left(|\widetilde{p}_{r,b,\lambda}(t; D) - p_{r,b,\lambda}(t)| > \frac{\epsilon}{2}\right) \leq 2 \exp\left(-\frac{n\epsilon^2}{2b}\right). \quad (6)$$

Now, consider  $\widetilde{p}_{r,b,\lambda}(t; D)$  for a fixed set of samples  $D$ . We can think of  $\widetilde{p}_{r,b,\lambda}(t; D)$  as the expected value of a random variable on a uniform distribution over subsets of size  $b$  i.e. imagine we have a random variable  $Y$  which can take values  $F_{\lambda,r}^t(D_b)$  for  $D_b \in S_b(D)$ , and

$$\mathbb{P}(Y = F_{\lambda,r}^t(D_b)) = \frac{1}{\binom{n}{b}}, \quad (7)$$

so that  $\tilde{p}_{r,b,\lambda}(t; D) = \mathbb{E}[Y]$ . Then,  $\hat{p}_{r,b,\lambda}(t; D)$  is an estimate of  $\mathbb{E}[Y]$ , computed by averaging  $N$  values of  $Y$ , chosen independently and uniformly randomly. Using McDiarmid's inequality (McDiarmid, 1989), we can therefore concentrate  $\hat{p}_{r,b,\lambda}(t; D)$  around  $\tilde{p}_{r,b,\lambda}(t; D)$  as

$$\begin{aligned} \mathbb{P}\left(\left|\hat{p}_{r,b,\lambda}(t; D) - \tilde{p}_{r,b,\lambda}(t; D)\right| > \frac{\epsilon}{2} \mid D\right) &\leq 2 \exp\left(-\frac{N\epsilon^2}{2}\right), \\ \Rightarrow \mathbb{P}\left(\left|\hat{p}_{r,b,\lambda}(t; D) - \tilde{p}_{r,b,\lambda}(t; D)\right| > \frac{\epsilon}{2}\right) &\leq 2 \exp\left(-\frac{N\epsilon^2}{2}\right), \end{aligned} \quad (8)$$

where we obtain the second inequality by integrating  $D$  out, since the RHS does not depend on  $D$ .

Combining Equation (6) and (8), we get

$$\mathbb{P}\left(\left|\hat{p}_{r,b,\lambda}(t; D) - p_{r,b,\lambda}(t)\right| > \epsilon\right) \leq 2 \exp\left(-\frac{n\epsilon^2}{2b}\right) + 2 \exp\left(-\frac{N\epsilon^2}{2}\right). \quad (9)$$

For,  $N \geq \lceil \frac{n}{b} \rceil$ , this becomes

$$\mathbb{P}\left(\left|\hat{p}_{r,b,\lambda}(t; D) - p_{r,b,\lambda}(t)\right| > \epsilon\right) \leq 4 \exp\left(-\frac{n\epsilon^2}{2b}\right). \quad (10)$$

Now, by the union bound,

$$\begin{aligned} \mathbb{P}\left(\exists t \in V \setminus r \text{ s.t. } \left|\hat{p}_{r,b,\lambda}(t; D) - p_{r,b,\lambda}(t)\right| > \epsilon\right) &\leq 4(p-1) \exp\left(-\frac{n\epsilon^2}{2b}\right) \\ &\leq 4p \exp\left(-\frac{n\epsilon^2}{2b}\right) \end{aligned} \quad (11)$$

Finally, observe that  $\exists t' \in V \setminus r$  s.t.

$$\begin{aligned} \left|\widehat{\mathcal{M}}_{r,b,\lambda}(D) - \mathcal{M}_{r,b,\lambda}\right| &= \left| \max_{t_1 \in V \setminus r} \hat{p}_{r,b,\lambda}(t_1; D) (1 - \hat{p}_{r,b,\lambda}(t_1; D)) - \max_{t_2 \in V \setminus r} p_{r,b,\lambda}(t_2) (1 - p_{r,b,\lambda}(t_2)) \right| \\ &\leq \left| \hat{p}_{r,b,\lambda}(t'; D) (1 - \hat{p}_{r,b,\lambda}(t'; D)) - p_{r,b,\lambda}(t') (1 - p_{r,b,\lambda}(t')) \right| \\ &\leq \left| \hat{p}_{r,b,\lambda}(t'; D) - p_{r,b,\lambda}(t') \right| + \left| (\hat{p}_{r,b,\lambda}(t'; D) - p_{r,b,\lambda}(t')) (\hat{p}_{r,b,\lambda}(t'; D) + p_{r,b,\lambda}(t')) \right| \\ &\leq 3 \left| \hat{p}_{r,b,\lambda}(t'; D) - p_{r,b,\lambda}(t') \right| \end{aligned} \quad (12)$$

An instance of the  $t'$  used in the above set of inequations can be one of  $t_1^*$  or  $t_2^*$ , corresponding to the optimal for  $\left(\arg \max_{t_1 \in V \setminus r} \hat{p}_{r,b,\lambda}(t_1; D) (1 - \hat{p}_{r,b,\lambda}(t_1; D))\right)$  and  $\left(\arg \max_{t_2 \in V \setminus r} p_{r,b,\lambda}(t_2) (1 - p_{r,b,\lambda}(t_2))\right)$  respectively.

Thus,

$$\left|\widehat{\mathcal{M}}_{r,b,\lambda}(D) - \mathcal{M}_{r,b,\lambda}\right| > \epsilon \Rightarrow \exists t' \in V \setminus r \text{ s.t. } \left|\hat{p}_{r,b,\lambda}(t'; D) - p_{r,b,\lambda}(t')\right| > \epsilon/3 \quad (13)$$

Using the result of Equation (10) now proves the lemma.  $\square$

### 3. Proof of Proposition 2

*Proof.* Consider any  $t \in V \setminus r$ . From Assumption 1, we know that

$$\begin{aligned} \forall \lambda \in [0, \lambda_{\min}(t)], \quad p_{r,b,\lambda}(t) &> (1 - 2 \exp(-c \log p)) \text{ and,} \\ \forall \lambda \in [\lambda_{\min}(t), \lambda_{\max}(t)], \quad 2 \exp(-c \log p) &\leq p_{r,b,\lambda}(t) \leq (1 - 2 \exp(-c \log p)). \end{aligned} \quad (14)$$

This implies that

$$\begin{aligned} \forall \lambda \in [0, \lambda_{\min}(t)], \quad p_{r,b,\lambda}(t) (1 - p_{r,b,\lambda}(t)) &< \gamma \text{ and,} \\ \forall \lambda \in [\lambda_{\min}(t), \lambda_{\max}(t)], \quad p_{r,b,\lambda}(t) (1 - p_{r,b,\lambda}(t)) &\geq \gamma. \end{aligned} \quad (15)$$

Suppose we pick  $\lambda'_l = \min_{t \in V \setminus r} \lambda_{\min}(t)$ . Then for all  $\lambda < \lambda'_l$ ,  $\mathcal{M}_{r,b,\lambda} < \gamma$ , and at  $\lambda'_l$ ,  $\mathcal{M}_{r,b,\lambda'_l} \geq \gamma$ . This means that  $\lambda'_l$  is the solution to  $\inf \{\lambda \geq 0 : \mathcal{M}_{r,b,\lambda} \geq \gamma\}$ . Thus,  $\lambda_l = \inf \{\lambda \geq 0 : \mathcal{M}_{r,b,\lambda} \geq \gamma\}$  exists and

$$\lambda_l = \lambda'_l = \min_{t \in V \setminus r} \lambda_{\min}(t). \quad (16)$$

To prove the existence of  $\lambda_u$ , we first have the following claim, the proof of which is described in Subsection 3.1.

**Claim 1.** *For any node  $r \in V$ , there exists a regularization parameter  $\lambda_s$  ( $0 \leq \lambda_s \leq 1$ ) s.t. for all  $\lambda > \lambda_s$ ,  $p_{r,b,\lambda}(t) = 0 \forall t \in V \setminus r$ , and as a consequence,  $\mathcal{M}_{r,b,\lambda} = 0$ .*

Now, observe that  $\mathcal{M}_{r,b,\lambda}$  is a continuous function of  $\lambda$ , since  $\mathcal{M}_{r,b,\lambda} = \max_{t \in V \setminus r} p_{r,b,\lambda}(t) (1 - p_{r,b,\lambda}(t))$  is just a maximum of continuous functions.

So,  $\mathcal{M}_{r,b,\lambda_l} \geq \gamma$ ,  $\mathcal{M}_{r,b,\lambda_s} = 0$  (from Claim 1) and the continuity of  $\mathcal{M}_{r,b,\lambda}$ , together imply that  $\lambda_u = \inf \{\lambda > \lambda_l : \mathcal{M}_{r,b,\lambda} < \gamma\}$  exists. Also, we have  $\lambda_u \leq \lambda_s$ .

Finally, (b) is a consequence of the continuity of  $p_{r,b,\lambda}(t)$ . From (16), we know that  $\lambda_l = \min_{t \in V \setminus r} \lambda_{\min}(t)$ . Therefore, at  $t' = \arg \min_{t \in V \setminus r} \lambda_{\min}(t)$  we have

$$p_{r,b,\lambda_l}(t') = 1 - 2 \exp(-c \log p). \quad (17)$$

Note that equality occurs due to continuity of  $p_{r,b,\lambda}(t)$ . At  $\lambda_u$ , since  $\mathcal{M}_{r,b,\lambda_u} < \gamma$ , we must have either  $p_{r,b,\lambda_u}(t') > 1 - 2 \exp(-c \log p)$  or  $p_{r,b,\lambda}(t') < 2 \exp(-c \log p)$ . This means that either  $\lambda_u < \lambda_{\min}(t')$  or  $\lambda_u > \lambda_{\max}(t')$ . However, since  $\lambda_u > \lambda_l = \lambda_{\min}(t')$ , we cannot have the former. Thus,  $p_{r,b,\lambda_u}(t') < 2 \exp(-c \log p)$ .

So, to summarize,

$$\begin{aligned} \text{At } \lambda_l, \quad p_{r,b,\lambda_l}(t') &= 1 - 2 \exp(-c \log p) \text{ and} \\ \text{at } \lambda_u, \quad p_{r,b,\lambda_u}(t') &< 2 \exp(-c \log p), \end{aligned} \quad (18)$$

*i.e.* between  $\lambda_l$  and  $\lambda_u$ ,  $p_{r,b,\lambda}(t')$  goes from a value close to 1, to a value close to 0. Now, continuity of  $p_{r,b,\lambda}(t')$  implies that for any  $k \in (\gamma, 1/4]$ , there exists a  $\lambda$  s.t.  $p_{r,b,\lambda}(t') (1 - p_{r,b,\lambda}(t')) \geq k$ , which implies  $\mathcal{M}_{r,b,\lambda} \geq k$ .  $\square$

### 3.1. Proof of Claim 1

*Proof.* Let  $D$  be any set of  $b$  samples,  $D = \{x^{(1)} \dots, x^{(b)}\}$ . Any solution,  $\tilde{\theta}_{\setminus r}$ , of (7) (with the samples  $D$ ) must satisfy

$$\nabla \mathcal{L}(\tilde{\theta}_{\setminus r}; D) + \lambda z = 0 \quad (19)$$

for some  $z \in \partial \|\tilde{\theta}_{\setminus r}\|_1$ .

Suppose we have  $\lambda > \|\nabla \mathcal{L}(0; D)\|_\infty$  and we pick  $z_i = -[\nabla \mathcal{L}(0; D)]_i / \lambda$ . Then,  $z \in \partial \|\tilde{\theta}_{\setminus r}\|_1$  for  $\tilde{\theta}_{\setminus r} = 0$  and  $(0, z)$  satisfies (19). Thus, 0 is an optimum for (7). Also, since we have shown the existence of a subgradient  $z$  s.t.  $\|z\|_\infty < 1$ , by Lemma 1 in (Ravikumar et al., 2010) we know that 0 is the only solution. If we pick  $\lambda_s = \max_{D \in \{-1,1\}^{pb}} \|\nabla \mathcal{L}(0; D)\|_\infty$ , then for any  $\lambda > \lambda_s$ , 0 is the unique optimum for any choice of  $D$ . This implies that  $p_{r,b,\lambda}(t) = 0 \forall t \in V \setminus r$  and  $\mathcal{M}_{r,b,\lambda} = 0$ . Finally, note that

$$\|\nabla \mathcal{L}(0; D)\|_\infty = \max_{t \in V \setminus r} \left| \frac{1}{n} \sum_{i=1}^b x_r^{(i)} x_t^{(i)} \right| \leq 1 \Rightarrow \lambda_s \leq 1 \quad (20)$$

$\square$

## 4. Proof of Proposition 4

*Proof.* Consider any  $t \in V \setminus r$ . We have

$$\text{Either } \lambda_u < \lambda_{\min}(t) \text{ or } \lambda_u > \lambda_{\max}(t). \quad (21)$$

This can be seen as at  $\lambda_u$ , we have  $\mathcal{M}_{r,b,\lambda_u} > \gamma = 2 \exp(-c \log p) (1 - 2 \exp(-c \log p))$ . This implies that

$$\text{Either } p_{r,b,\lambda_u}(t) > 1 - 2 \exp(-c \log p) \text{ or } p_{r,b,\lambda_u}(t) < 2 \exp(-c \log p). \quad (22)$$

Based on Assumption 1(a), this implies equation (21).

Now, consider this for any two irrelevant variables  $t_1, t_2 \notin \mathcal{N}^*(r)$ . We cannot have  $\lambda_u < \lambda_{\min}(t_1)$  and  $\lambda_u > \lambda_{\max}(t_2)$  (or vice-versa), as this would violate Assumption 1(b). Thus, we must have

$$\text{Either } \lambda_u < \min_{t \notin \mathcal{N}^*(r)} \lambda_{\min}(t) \text{ or } \lambda_u > \max_{t \notin \mathcal{N}^*(r)} \lambda_{\max}(t). \quad (23)$$

We shall show that the former possibility cannot happen. To see this, assume  $\lambda_u < \min_{t \notin \mathcal{N}^*(r)} \lambda_{\min}(t)$ . Then, using Assumption 1(c), this means that  $\lambda_u < \lambda_{\max}(\tilde{t})$ , for any  $\tilde{t} \in V \setminus r$ . But, from (21), this must imply that  $\lambda_u < \lambda_{\min}(\tilde{t})$ , for any  $\tilde{t} \in V \setminus r$ . However, this is a contradiction, since  $\lambda_u > \lambda_l = \min_{t \in V \setminus r} \lambda_{\min}(t)$ , where the equality comes through the same argument used to show (16).

Thus,  $\lambda_u > \max_{t \notin \mathcal{N}^*(r)} \lambda_{\max}(t)$ . This implies that  $p_{r,b,\lambda_u}(t) < 2 \exp(-c \log p)$  for any  $t \notin \mathcal{N}^*(r)$  i.e.

$$\text{For any } t \notin \mathcal{N}^*(r), \mathbb{P}\left(t \notin \widehat{\mathcal{N}}_{b,\lambda_u}(r; D)\right) \geq 1 - 2 \exp(-c \log p). \quad (24)$$

Using union bound on the irrelevant variables, we get that  $\mathbb{P}\left(\widehat{\mathcal{N}}_{b,\lambda_u}(r; D) \subseteq \mathcal{N}^*(r)\right) \geq 1 - 2 \exp(-(c-1) \log p)$ .  $\square$

## 5. Proof of Proposition 3

*Proof.* Following the same argument as in Proposition 4 above, we can infer that for any  $t \notin \mathcal{N}^*(r)$ ,  $p_{r,b,\lambda_u}(t) < 2 \exp(-c \log p)$ .

Using Corollary 1, we know that there exists a  $\lambda_0$  s.t.

$$\begin{aligned} p_{r,b,\lambda_0}(t) &\geq 1 - 2 \exp(-c_1 c_4 \log p) > 1 - 2 \exp(-c \log p) && \text{if } t \in \mathcal{N}_{sub}^*(r) \\ p_{r,b,\lambda_0}(t) &\leq 2 \exp(-c_1 c_4 \log p) < 2 \exp(-c \log p) && \text{if } t \notin \mathcal{N}_{sub}^*(r). \end{aligned} \quad (25)$$

Based on Assumption 1, this means for any  $t \in \mathcal{N}_{sub}^*(r)$  we have  $\lambda_0 < \lambda_{\min}(t)$ , and for any  $t \notin \mathcal{N}_{sub}^*(r)$  we have  $\lambda_0 > \lambda_{\max}(t)$ .

Observe that  $\lambda_0 > \lambda_l$ . This is because for any  $t' \notin \mathcal{N}_{sub}^*(r)$ ,  $\lambda_0 > \lambda_{\max}(t')$  which implies  $\lambda_0 > \lambda_{\min}(t')$ , whereas  $\lambda_l = \min_{t'' \in V \setminus r} \lambda_{\min}(t'')$ , using arguments used to show (16).

Now, we shall show that we cannot have  $\lambda_0 < \lambda_u$ . Suppose  $\lambda_0 < \lambda_u$ . From (25), we have that  $\mathcal{M}_{r,b,\lambda_0} < \gamma$ , where  $\gamma$  is as defined in Assumption 1. So, we get  $\lambda_0 \in (\lambda_l, \lambda_u)$  s.t.  $\mathcal{M}_{r,b,\lambda_0} < \gamma$ . This is a contradiction since  $\lambda_u = \inf\{\lambda > \lambda_l : \mathcal{M}_{r,b,\lambda} < \gamma\}$ . Therefore, we must have  $\lambda_u \leq \lambda_0$ .

So, for any  $t \in \mathcal{N}_{sub}^*(r)$ ,  $\lambda_u < \lambda_{\min}(t)$ , which means that  $p_{r,b,\lambda_u}(t) > 1 - 2 \exp(-c \log p)$ . Now, taking a union bound over the exclusion of all irrelevant variables and the inclusion of all variables in  $\mathcal{N}_{sub}^*(r)$  proves the proposition.  $\square$

## 6. Proof of Theorem 2

Since this is a simple corollary, we shall only provide an outline of the proof here. The conditions specified in the theorem ensure that Proposition 3 is true for any node  $r \in V$  with degree,  $d(r) \leq d$ , and that, Proposition 4 is true for any other node. In addition, owing to the choice of  $n$  and  $N$ , Proposition 2 guarantees that  $\widehat{\mathcal{M}}_{r,b,\lambda}$  would be reliable estimate for  $\mathcal{M}_{r,b,\lambda}$  upto a tolerance of  $\epsilon$  w.h.p. Thus, running Algorithm 2, with the parameters specified, for all nodes would yield the  $\mathcal{N}_{sub}^*(r)$  neighbourhoods of nodes with degree at most  $d$ , and yield subsets of the true neighbourhoods for the rest.  $E_d$  is defined to be the set of edges  $(u, v)$  such that atleast one of its endpoints is a node with degree at most  $d$  (say  $u$ ), and the other belongs to the  $\mathcal{N}_{sub}^*$  neighbourhood of the first (i.e.  $v \in \mathcal{N}_{sub}^*(u)$ ). Then, if we consider the union of all neighbourhoods obtained from Algorithm 2, clearly, the set  $E_d$  gets recovered with high probability.

## 7. Proof of Corollary 2

This is again a simple consequence of Theorem 2. Under the conditions specified here, the set  $E_d$ , defined in Theorem 2, becomes the set of true edges  $E^*$ . Thus, we are guaranteed exact graph recovery in this setting.

## References

- Liu, Han, Roeder, Kathryn, and Wasserman, Larry A. Stability approach to regularization selection (stars) for high dimensional graphical models. In *NIPS*, pp. 1432–1440, 2010.
- McDiarmid, C. On the method of bounded differences. In *Surveys in Combinatorics*, number 141 in London Mathematical Society Lecture Note Series, pp. 148–188. Cambridge University Press, August 1989.
- Ravikumar, P., Wainwright, M. J., and Lafferty, J. High-dimensional ising model selection using  $\ell_1$ -regularized logistic regression. *Annals of Statistics*, 38(3):1287–1319, 2010.
- Serfling, Robert J. *Approximation Theorems of Mathematical Statistics*. Wiley-Interscience, 1981.
